# Supplementary material for: Методика анализа временных рядов данных в комплексной оценке метеои магниточувствительности организма человека
Source: Royal Society of Chemistry journal article supplement (doi:10.1039/c8dt02675k), 2010-01-01
Supplement: c8dt02675k1.pdf [file c8dt02675k1.pdf]

## **Two novel donor-acceptor hybrid heterostructures with enhanced visible-light photocatalytic properties**

Jian-Jun Liu<sup>ab</sup>, Zheng Xiang<sup>a</sup>, Ying-Fang Guan<sup>a</sup>, Chang-Cang Huang<sup>a\*</sup> and Mei-Jin Lin<sup>a\*</sup>

<sup>a</sup> *State Key Laboratory of Photocatalysis on Energy and Environment, College of Chemistry, Fuzhou University, China, 350116*

<sup>b</sup> *Center for Yunnan-Guizhou Plateau Chemical Functional Materials and Pollution Control, Qujing Normal University, China, 655011*

*Email: meijin\_lin@fzu.edu.cn*

**Materials and Methods:** All chemicals and reagents were used as received unless otherwise stated.

IR spectra were recorded in the range 4000-400  $\text{cm}^{-1}$  on a Perkin-Elmer FT-IR spectrum 2000 spectrometer with pressed KBr pellets. Powder X-ray diffraction (PXRD) patterns were recorded with a Rigaku Ultima IV diffractometer with Cu  $K\alpha$  ( $\lambda = 1.5418 \text{ \AA}$ ) radiation in the range of 5–50° at a rate of 10°/min. TGA measurements were performed on a TG-209 system with a heating rate of 10 °C/min under an  $\text{N}_2$ -atmosphere. UV-Vis diffuse reflectance spectra were recorded at room temperature on a Varian Cary 500 UV-Vis spectrophotometer equipped with an integrating sphere. The organic ligand 1,1'-bis(4-carboxybenzyl)-4,4'-bipyridinium dichloride ( $\text{H}_2\text{Bpybc}\cdot 2\text{Cl}$ ) was synthesized following the reported process.<sup>[S1]</sup>

**Synthesis of compound 1.** An acetonitrile solution (5mL) of CuI (0.3 mmol, 57.3 mg) was carefully layered on a solution (5 mL) containing  $\text{ZnI}_2$  (0.3 mmol, 95.7 mg) and  $\text{H}_2\text{Bpybc}\cdot 2\text{Cl}$  (0.05mmol, 24.8 mg) with MeCN/ $\text{H}_2\text{O}$  (1 mL/1 mL) placed between the two layers. Dark block crystals of **1** formed in five days. The product was collected by filtration and dried in the vacuum oven. Yield: 55% based on  $\text{H}_2\text{Bpybc}\cdot 2\text{Cl}$ . Anal. Calcd for  $\text{C}_{81}\text{H}_{72}\text{Cu}_{11}\text{I}_{13}\text{N}_{12}\text{O}_{20}\text{Zn}_2$ : C 24.22, H 1.79, N 4.18%. Found: C 24.15, H 1.86, N 4.14%. IR data (KBr,  $\text{cm}^{-1}$ ): 3554(w), 3113(w), 3049(m), 2959 (w), 1637(s), 1603(s), 1541(s), 1436(s), 1370 (s), 1165(m), 1009 (m), 794(m), 761(s).

**Synthesis of compound 2.** An acetonitrile solution (5mL) of CuI (0.3 mmol, 57.3 mg) was carefully layered on a solution (5 mL) containing  $\text{Tb}(\text{NO}_3)_3\cdot 6\text{H}_2\text{O}$  (0.1 mmol, 43.8 mg) and  $\text{H}_2\text{Bpybc}\cdot 2\text{Cl}$  (0.05mmol, 24.8 mg) with MeCN/ $\text{H}_2\text{O}$  (1 mL/1 mL) placed between the two layers. Dark plate-like crystals of **2** formed in several days. The product was collected by filtration and dried in the vacuum oven. Yield: 36% based on  $\text{H}_2\text{Bpybc}\cdot 2\text{Cl}$ . Anal. Calcd for  $\text{C}_{52}\text{H}_{40}\text{Cu}_5\text{I}_7\text{N}_4\text{O}_{14}\text{Tb}$ : C 27.01, H 1.73, N 2.42%. Found: C 26.86, H 1.76, N 2.34%. IR data (KBr,  $\text{cm}^{-1}$ ): 3396(br), 3110(w), 3039(w), 1639(m),

1606(s), 1529(s), 1454(m), 1394(s), 1210(m), 1011(m), 848(m), 820(s), 773(s), 711(m), 644(s).

### **Photocatalytic Activity Measurements**

The photocatalytic activities of as-prepared samples **1** and **2** were evaluated by the degradation of RhB as model dye pollutant. In a typical process, the visible light source was a 300 W Xe lamp equipped with a  $\lambda \geq 420$  nm cut off filter and an IR filter. In the photo-degradation experiments of RhB, 50 mg of each sample of the compound was added to 50 mL of a  $1 \times 10^{-5}$  mol·L<sup>-1</sup> solution of RhB. Before irradiation, the suspensions were magnetically stirred in the dark for 120 min to achieve adsorption-desorption equilibrium of the organic contaminants on the catalyst surfaces. Every 5 min, 3 mL of the suspensions were continually taken from the reaction cell and the catalyst was separated from the suspension by centrifugation. The residual concentrations of RhB in solution were analyzed by recording variations of the organics at the absorption band maximum in the UV–Vis spectra using a UV-Vis spectrophotometer. For collecting an adequate sample in the recycling experiment, two or even more of the photocatalytic processes were carried out under the same conditions, and then the samples were separated through centrifugation. All of the precipitates from the different processes were collected, combined, and dried in an oven at 60 °C for 24 h. After that, 50 mg of dried sample was used to perform the second photocatalytic experiment according to the same method as that of the first study. The third recycling experiment was also carried out with the same method. The percentage of degradation is reported as  $C/C_0$ . Here, C is the absorption of RhB at each irradiated time interval of the main peak of the absorption spectrum at 554 nm. And  $C_0$  is the absorption of the starting concentration when adsorption-desorption equilibrium is achieved.

## Crystallographic data collection and refinement

Suitable single crystal of complexes **1** and **2** were mounted on glass fiber for the X-ray measurement. Diffraction data were collected on a Rigaku-AFC7 equipped with a Rigaku Saturn CCD area-detector system. The measurement was made by using graphic monochromatic Mo K $\alpha$  radiation ( $\lambda = 0.71073 \text{ \AA}$ ) at 153 K under a cold nitrogen stream. The frame data were integrated and absorption correction using a Rigaku *CrystalClear* program package. All calculations were performed with the *SHELXTL-97* program package<sup>[S2]</sup>, and structures were solved by direct methods and refined by full-matrix least-squares against  $F^2$ . All non-hydrogen atoms were refined anisotropically, and hydrogen atoms of the organic ligands were generated theoretically onto the specific atoms. For complex **2**, the diffraction data were treated by the "SQUEEZE" method as implemented in PLATON to remove diffuse electron density associated with these badly disordered solvent molecules.<sup>[S3]</sup> Crystallographic data have been deposited with the Cambridge Crystallographic Data Center (CCDC) as supplementary publication number CCDC 1845680 and 1845681 for **1** and **2**, respectively. These data can be obtained free of charge from The Cambridge Crystallographic Data Centre *via* [www.ccdc.cam.ac.uk/data\\_request/cif](http://www.ccdc.cam.ac.uk/data_request/cif).

Table S1. Crystal Data and Structure Refinements for **1** and **2**.

| Complex                                    | <b>1</b>                                                                                                         | <b>2</b>                                                                                         |
|--------------------------------------------|------------------------------------------------------------------------------------------------------------------|--------------------------------------------------------------------------------------------------|
| Empirical Formula                          | C <sub>81</sub> H <sub>72</sub> Cu <sub>11</sub> I <sub>13</sub> N <sub>12</sub> O <sub>20</sub> Zn <sub>2</sub> | C <sub>52</sub> H <sub>40</sub> Cu <sub>5</sub> I <sub>7</sub> N <sub>4</sub> O <sub>14</sub> Tb |
| Formula weight                             | 4012.88                                                                                                          | 2309.86                                                                                          |
| Crystal system                             | Trigonal                                                                                                         | Monoclinic                                                                                       |
| Space group                                | <i>R</i> -3                                                                                                      | <i>P</i> 2/ <i>c</i>                                                                             |
| <i>a</i> (Å)                               | 18.893(3)                                                                                                        | 21.690(4)                                                                                        |
| <i>b</i> (Å)                               | 18.893(3)                                                                                                        | 12.031(2)                                                                                        |
| <i>c</i> (Å)                               | 26.092(5)                                                                                                        | 13.804(3)                                                                                        |
| $\alpha$ (deg)                             | 90                                                                                                               | 90                                                                                               |
| $\beta$ (deg)                              | 90                                                                                                               | 99.90(3)                                                                                         |
| $\gamma$ (deg)                             | 120                                                                                                              | 90                                                                                               |
| <i>V</i> (Å <sup>3</sup> )                 | 8066(3)                                                                                                          | 3548.6(13)                                                                                       |
| <i>Z</i>                                   | 3                                                                                                                | 2                                                                                                |
| <i>T</i> (K)                               | 153(2)                                                                                                           | 153(2)                                                                                           |
| $\rho_{\text{calc}}$ (g/cm <sup>3</sup> )  | 2.471                                                                                                            | 2.162                                                                                            |
| $\mu$ (Mo K $\alpha$ ) (mm <sup>-1</sup> ) | 6.362                                                                                                            | 5.555                                                                                            |
| F(000)                                     | 5574                                                                                                             | 2146                                                                                             |
| Collected reflections                      | 26076                                                                                                            | 25229                                                                                            |
| Unique reflections                         | 4109                                                                                                             | 6481                                                                                             |
| No. of observations                        | 3203                                                                                                             | 5264                                                                                             |
| GOF                                        | 1.046                                                                                                            | 1.108                                                                                            |
| $R_1^a, wR_2^b$ ( $I > 2\sigma(I)$ )       | 0.0706, 0.2163                                                                                                   | 0.0663, 0.2038                                                                                   |
| $R_1^a, wR_2^b$ (all data)                 | 0.0851, 0.2315                                                                                                   | 0.0777, 0.2140                                                                                   |

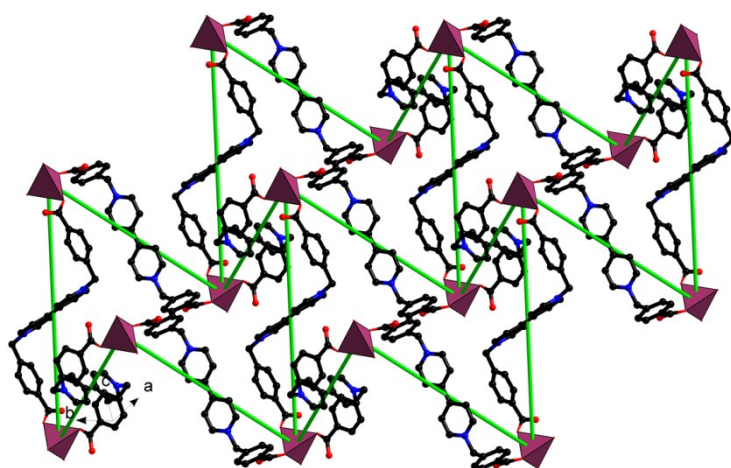

**Figure S1.** The (6, 3) network of **1**.

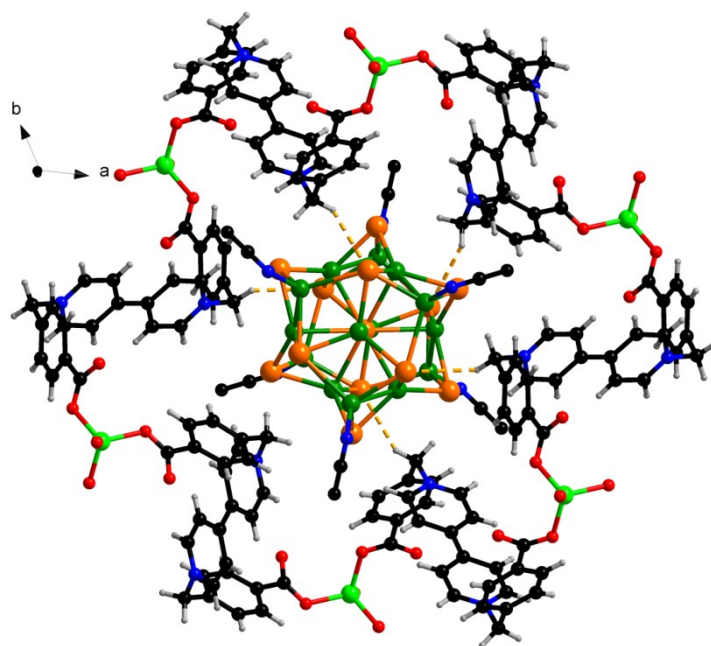

**Figure S2.** The hydrogen bond interactions between the cationic framework and  $\text{Cu}_{11}\text{I}_{13}^{2-}$  cluster in **2**.

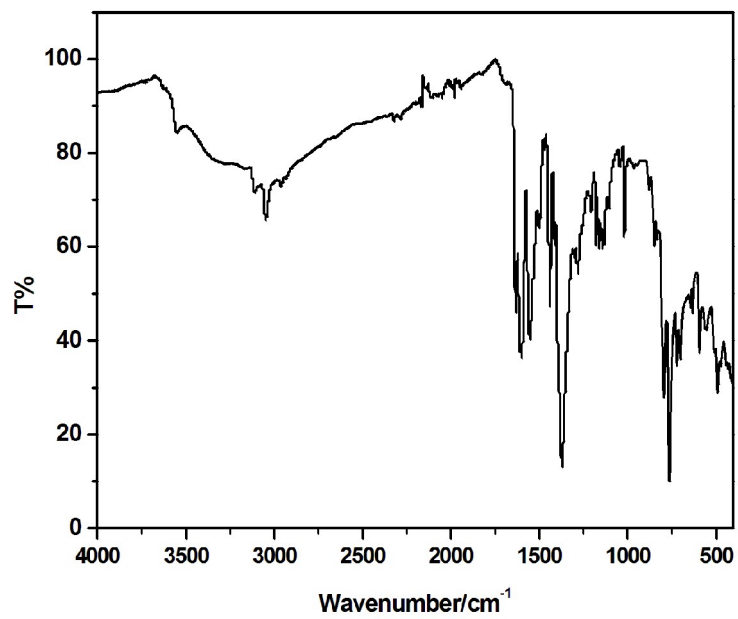

**Figure S3.** Infrared spectrum of **1**.

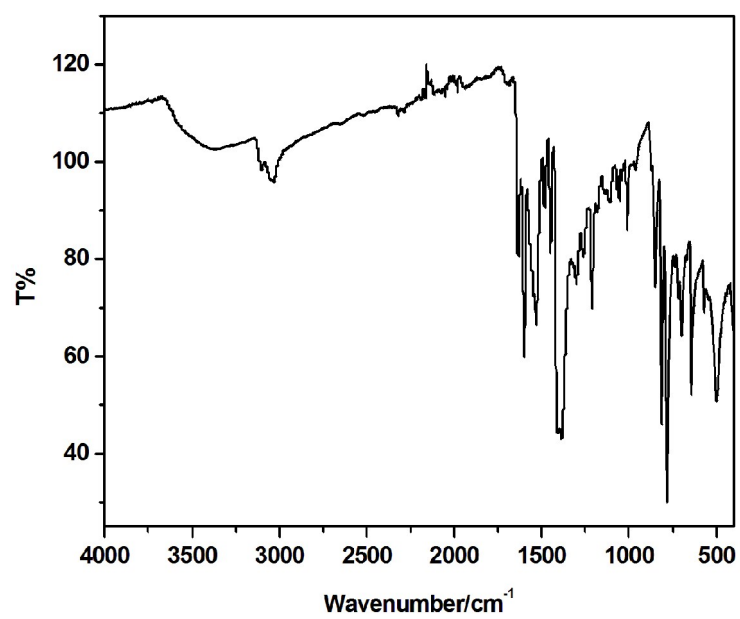

**Figure S4.** Infrared spectrum of **2**.

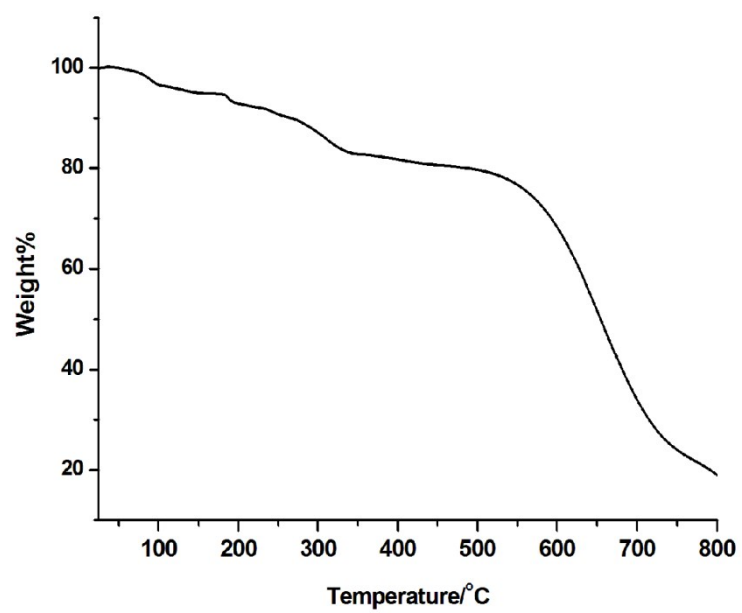

**Figure S5.** TGA curve of **1** under N<sub>2</sub> atmosphere with a heating rate of 10 °C/min.

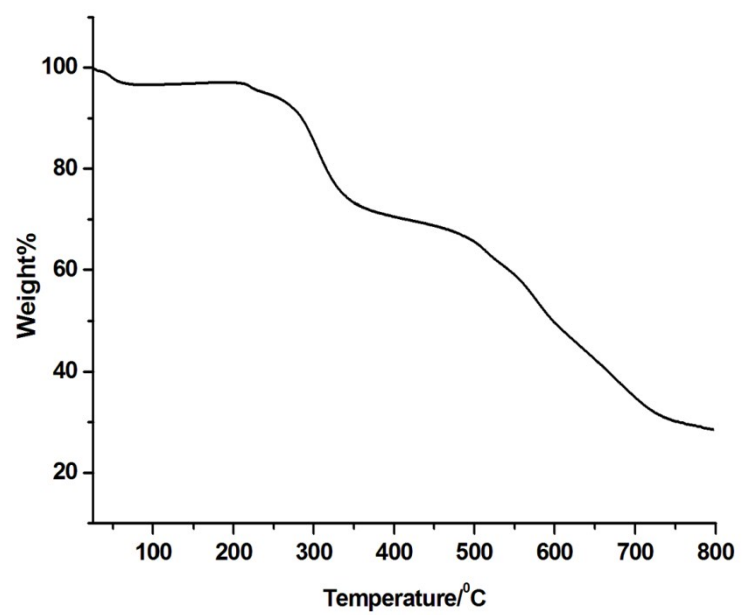

**Figure S6.** TGA curve of **2** under N<sub>2</sub> atmosphere with a heating rate of 10 °C/min.



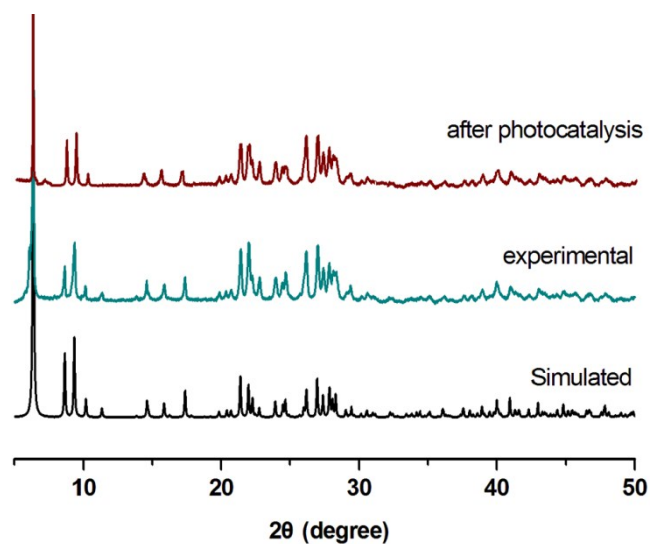

**Figure S7.** PXRD patterns of **1** before and after the photocatalysis.

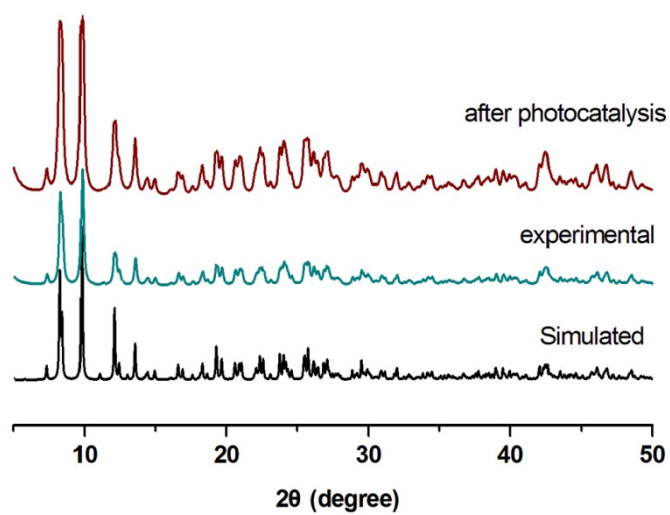

**Figure S8.** PXRD patterns of **2** before and after the photocatalysis.

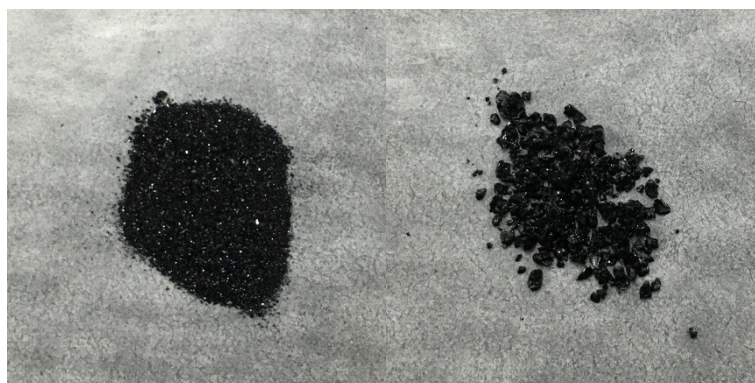

**Figure S9.** Photograph of **1** (left) and **2** (right).

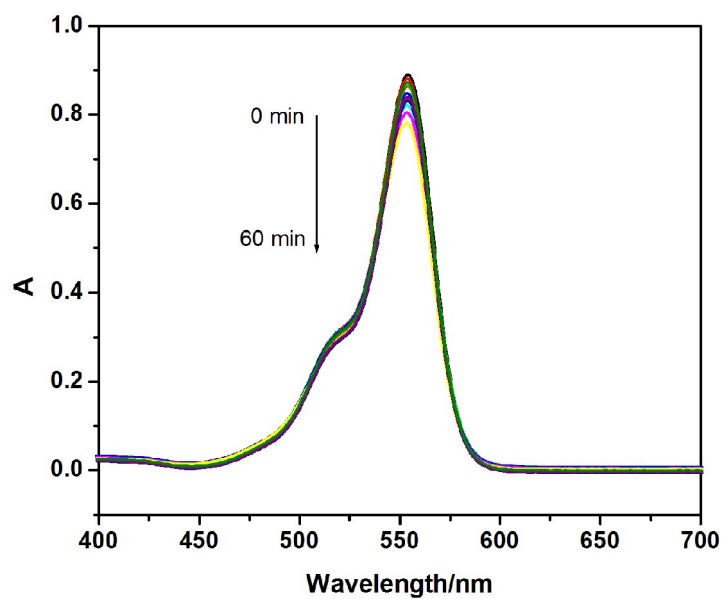

**Figure S10.** The absorption spectra of the RhB solution presence of CuI.

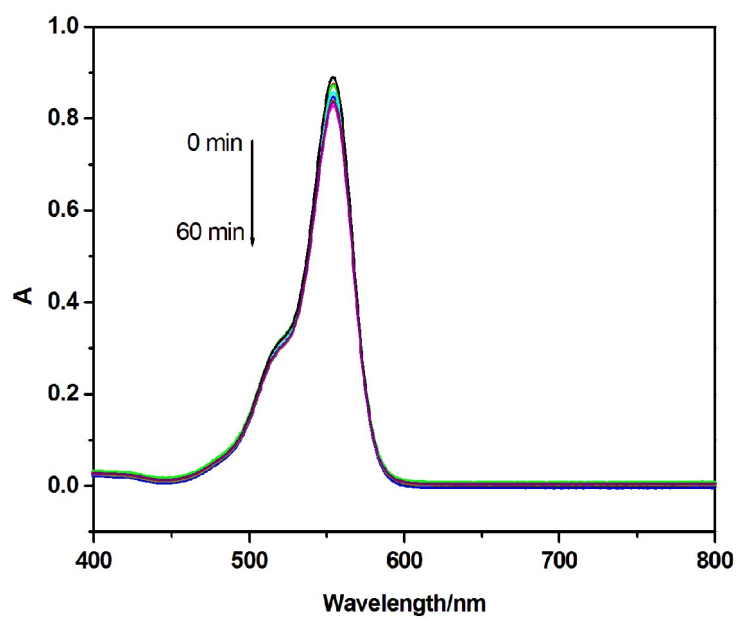

**Figure S11.** The absorption spectra of the RhB solution without presence of catalyst.

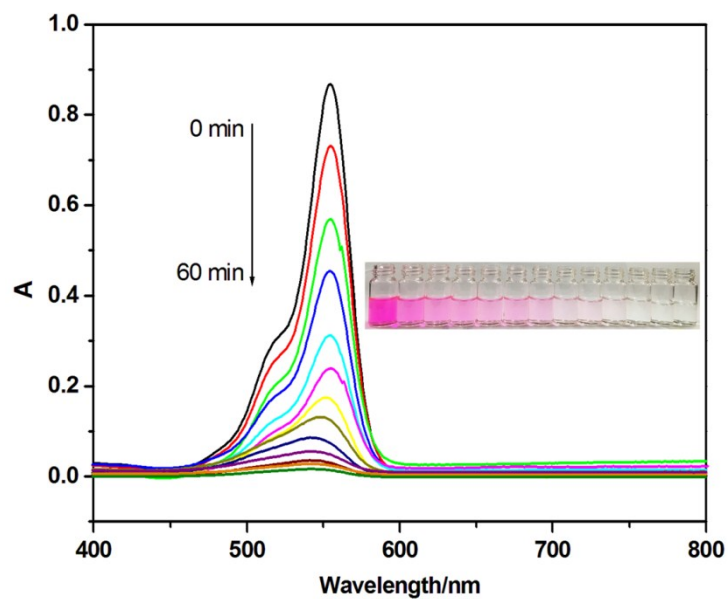

**Figure S12.** (a) The absorption spectra of the RhB solution in the presence of **1** under exposure to visible light.

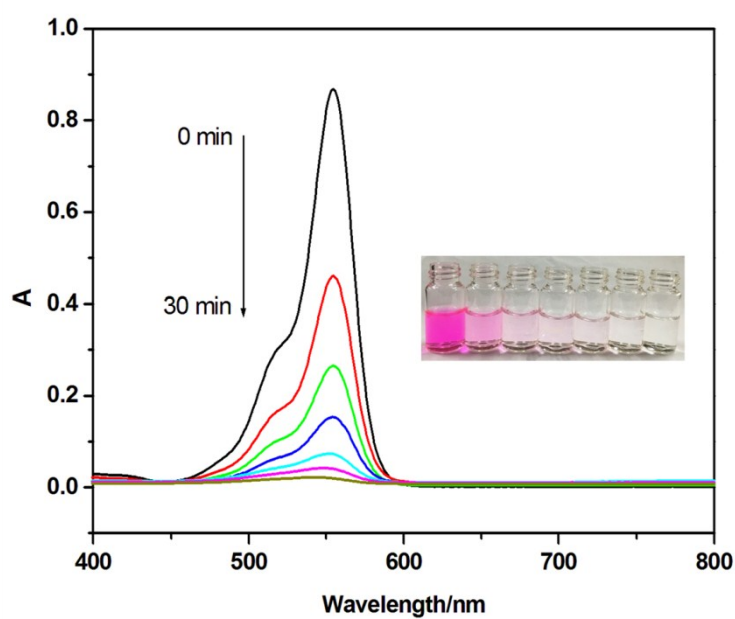

**Figure S13.** The absorption spectra of the RhB solution in the presence of **2** under exposure to visible light.

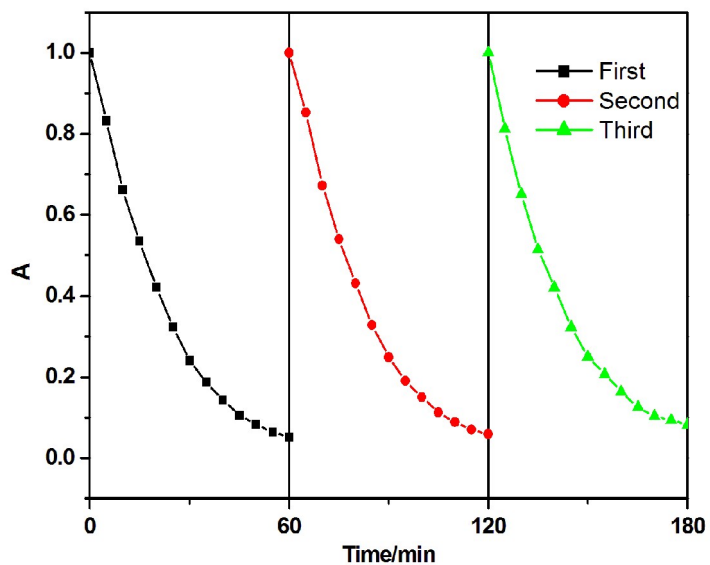

**Figure S14.** The irradiation-time dependences of the relative concentration  $C/C_0$  of the RhB over **1** during cycling photocatalytic experiments under visible light.

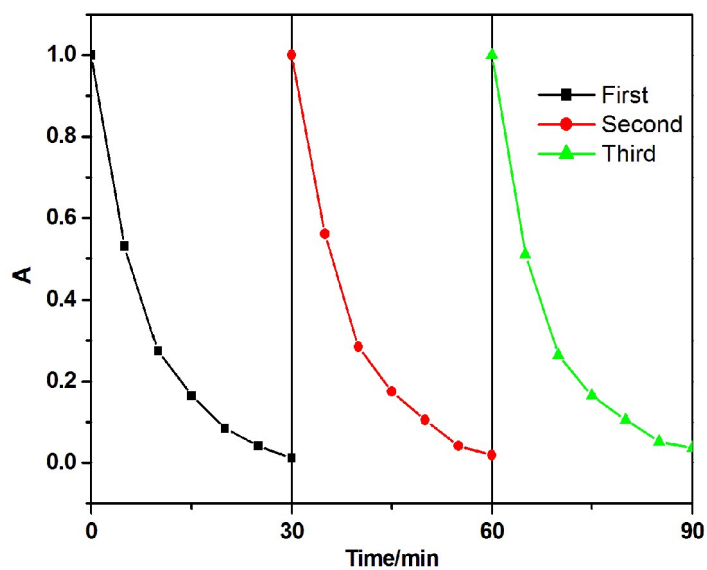

**Figure S15.** The irradiation-time dependences of the relative concentration  $C/C_0$  of the RhB over **2** during cycling photocatalytic experiments under visible light.

## References

- [S1] Y.-Q. Sun, J. Zhang, Z.-F. Ju and G.-Y. Yang, *Cryst. Growth & Des.*, **2005**, *5*, 1939.
- [S2] G. Sheldrick, A short history of SHELX. *Acta Cryst.* **2008**, *A64*, 112.
- [S3] A. L. Spek, Single-crystal structure validation with the program PLATON. *J. Appl. Cryst.*, **2003**, *36*, 7.
